# Supplementary material for: Inhibition of Zinc Dendrites Realized by a β-P(VDF-TrFE) Nanofiber Layer in Aqueous Zn-Ion Batteries
Source: MDPI journal article supplement (doi:10.3390/membranes12101014), 2022-10-19
Supplement: s1 [file s1]

Supporting Information for

## Inhibition of Zinc Dendrites Realized by a $\beta$ -P(VDF-TrFE) Nanofiber Layer in Aqueous Zn-Ion Batteries

Geumyong Park <sup>1,†</sup>, Hyeonhun Park <sup>1,†</sup>, WooJun Seol <sup>2</sup>, Seokho Suh <sup>1</sup>, Ji Young Jo <sup>2</sup>, Santosh Kumar <sup>1,3,\*</sup> and Hyeong-Jin Kim <sup>1,\*</sup>

<sup>1</sup> Graduate School of Energy Convergence, Institute of Integrated Technology, Gwangju Institute of Science and Technology (GIST), 123 Cheomdangwagi-ro, Buk-gu, Gwangju 61005, Korea

<sup>2</sup> School of Materials Science and Engineering, Gwangju Institute of Science and Technology (GIST), 123 Cheomdangwagi-ro, Buk-gu, Gwangju 61005, Korea

<sup>3</sup> Research Institute for Solar and Sustainable Energies (RISE), Gwangju Institute of Science and Technology (GIST), 123 Cheomdangwagi-ro, Buk-gu, Gwangju 61005, Korea

\* Correspondence: skumar@gist.ac.kr (S.K.); hjkimc@gist.ac.kr (H.-J.K.)

† These authors contributed equally to this work.

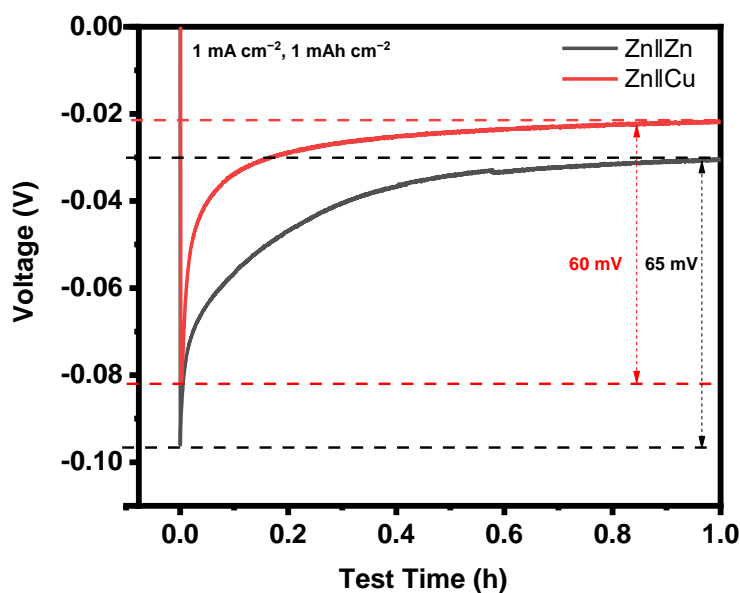

**Figure S1.** The voltage-time curves during Zinc nucleation at  $1 \text{ mA cm}^{-2}$  on Zn and Cu substrate.

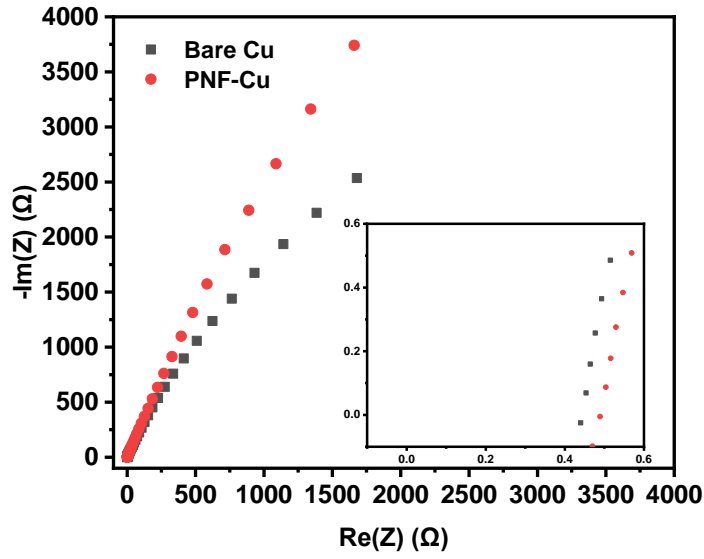

**Figure S2.** Ionic resistivity measurement of the bare Cu and PNF-Cu symmetric cells with the glass fiber as a separator. Nyquist plots were tested at open circuit voltage (OCV) over the frequency range of 100 kHz to 0.1 Hz.

Formula used for calculating the conductivity,

$$\sigma = \frac{L}{R_b S}$$

Where,

$$L_{\text{glass fiber}} = 0.211 \text{ mm}$$

$$S = 0.7854 \text{ cm}^2$$

$$R_b (\text{glass fiber}) = 0.4868 \text{ } \Omega$$

$$\sigma_{\text{glass fiber}} = 5.5 \times 10^{-2} \text{ S cm}^{-2}$$

$$R_b(\text{PVDF-TrFE}) = R_b - R_b (\text{glass fiber}) = 0.04921 \text{ } \Omega$$

$$L_{\text{P(VDF-TrFE)}} = 5 \mu\text{m} \times 2 = 10 \mu\text{m}$$

$$\sigma_{\text{P(VDF-TrFE)}} = 2.59 \times 10^{-2} \text{ S cm}^{-2}$$

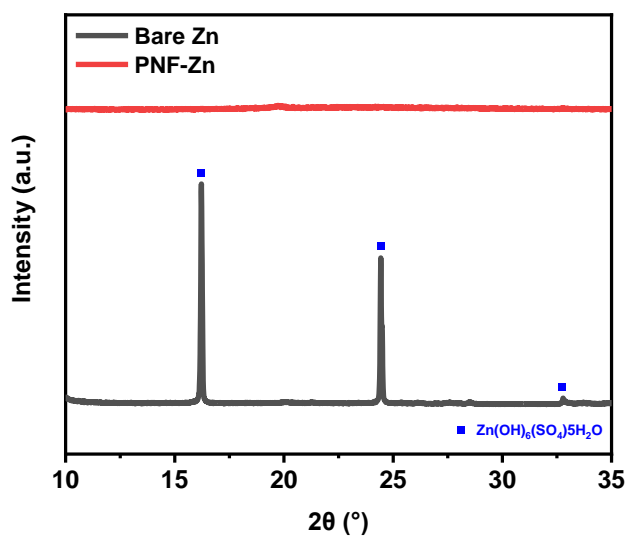

**Figure S3.** XRD data of the bare Zn and PNF-Zn after immersion in the electrolyte for 7 days.

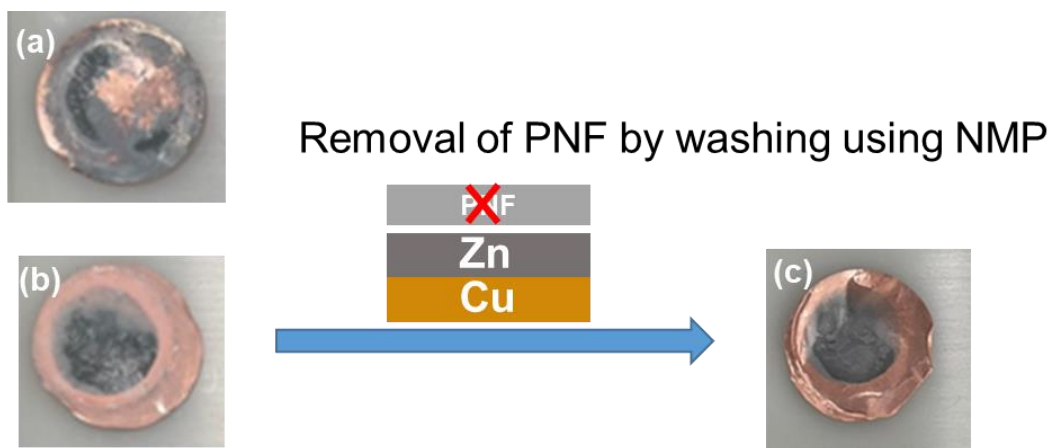

**Figure S4.** Digital images of Zn deposition on the (a) bare Cu and PNF-Cu (b) before removal and (c) after removal of the PNF layer.

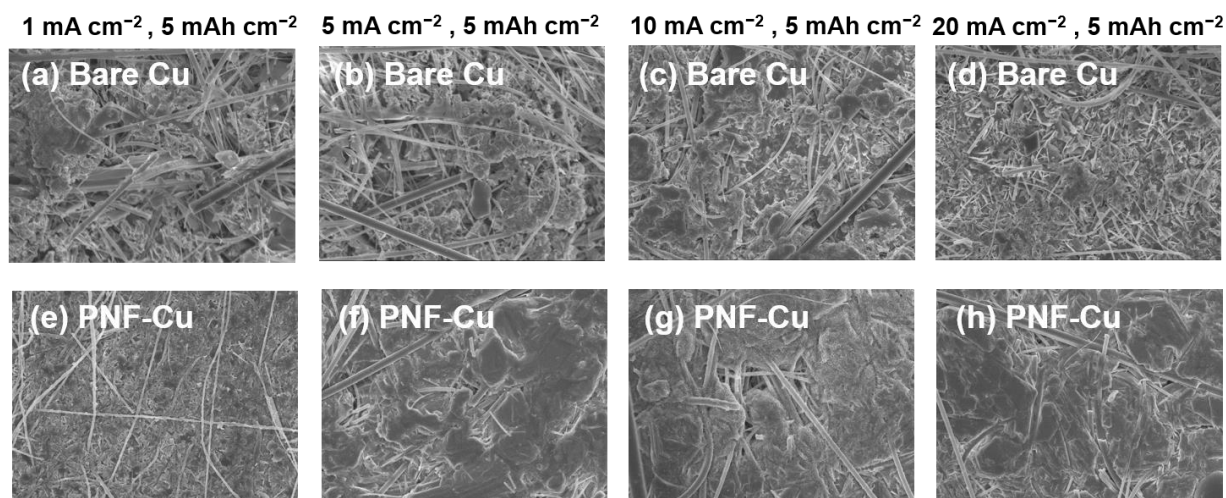

**Figure S5.** Top-view SEM images of Zn deposition morphology on (a-d) bare Cu electrode and (e-h) PNF-Cu under various current densities.

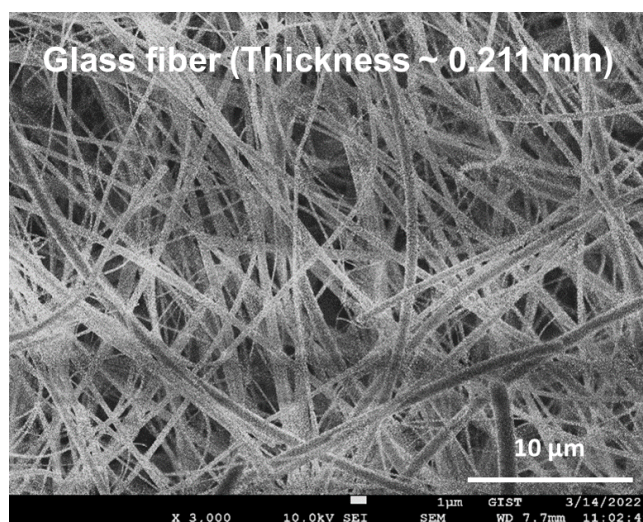

**Figure S6.** Top-view SEM image of glass fiber.

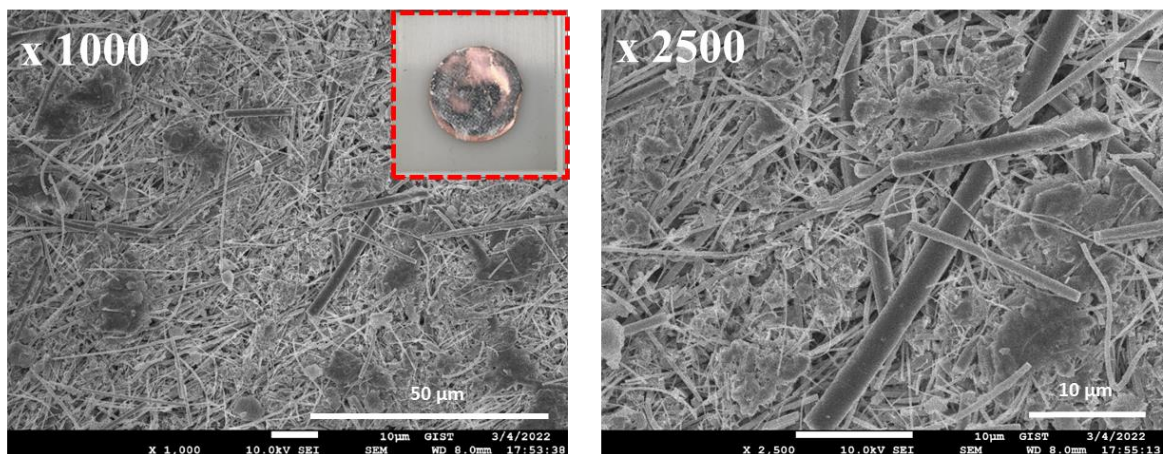

**Figure S7.** Top-view SEM images of Zn deposition morphology of Zn||Cu cell using two glass fibers as a separator.

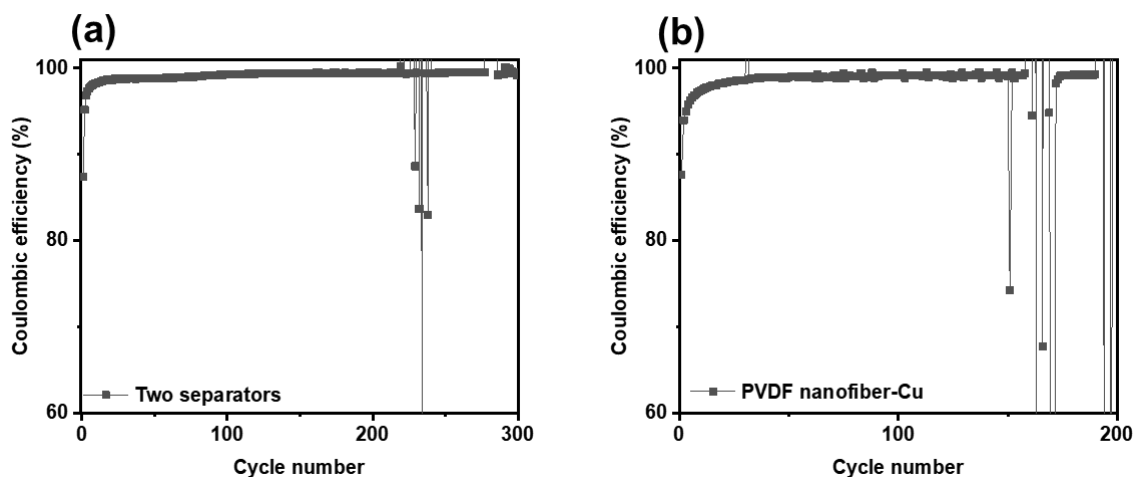

**Figure S8.** Coulombic efficiencies of long-term cycles at  $1 \text{ mA cm}^{-2}$  of the (a) Zn||Cu half cell using 2 separators and (b) Zn||PVDF-Cu half cell.

**Table S1.** Comparison table for the electrochemical performances by various materials used for surface modification of Zn anode.

| Materials                            | Areal capacity<br>(mA h cm <sup>-2</sup> ) | Current density<br>(mA cm <sup>-2</sup> ) | Coulombic<br>Efficiency<br>(%) | Cycle<br>number | Reference    |
|--------------------------------------|--------------------------------------------|-------------------------------------------|--------------------------------|-----------------|--------------|
| PNF                                  | 1                                          | 1                                         | 99.2                           | 300             | Present work |
| Nafion Zn-X                          | 2                                          | 0.2                                       | 97                             | 130             | 1            |
| nanoAu                               | 0.5                                        | 0.5                                       | 97.1                           | 60              | 2            |
| PA layer <sup>a</sup>                | 0.4                                        | 0.4                                       | 97.43                          | 300             | 3            |
| Cu/Zn                                | 0.5                                        | 5                                         | 91.8                           | 100             | 4            |
| β-PVDF                               | 0.18                                       | 0.36                                      | ~ 96.5                         | 200             | 5            |
| Sc <sub>2</sub> O <sub>3</sub>       | 0.56                                       | 1.13                                      | 99.85                          | 260             | 6            |
| ZnO                                  | 0.5                                        | 2                                         | 99.55                          | 300             | 7            |
| 502 glue                             | 1                                          | 2                                         | 99.74                          | 200             | 8            |
| ZnF <sub>2</sub>                     | 1                                          | 5                                         | 99.5                           | 1000            | 9            |
| Sn                                   | 1                                          | 1                                         | ~ 99                           | 250             | 10           |
| NCLTi <sup>b</sup>                   | 1                                          | 2                                         | 99.0                           | ~700            | 11           |
| Mg-Al LDH <sup>c</sup>               | 1                                          | 10                                        | 99.2                           | 2000            | 12           |
| PDMS/TiO <sub>2-x</sub> <sup>d</sup> | 0.5                                        | 0.5                                       | ~ 99.4                         | 450             | 13           |
| CG separator <sup>e</sup>            | 1                                          | 1                                         | 98.68                          | 100             | 14           |
| N-C <sup>f</sup>                     | 2                                          | 2                                         | 98.76                          | 120             | 15           |
| BaTiO <sub>3</sub>                   | 1                                          | 1                                         | /                              | 120             | 16           |
| ZnP                                  | 0.5                                        | 2                                         | 99.5                           | 200             | 17           |
| ZnS                                  | 1                                          | 2                                         | 99.2                           | 200             | 18           |
| CNG <sup>g</sup>                     | 1                                          | 0.5                                       | 99.4                           | 300             | 19           |

<sup>a</sup>Polyamide (PA), <sup>b</sup>NiCo layered double hydroxides (NCLTi), <sup>c</sup>Mg-Al layered double hydroxide (Mg-Al layered double hydroxide), <sup>d</sup>Poly(dimethylsiloxane) (PDMS), <sup>e</sup>Cellulose nanofibers and graphene oxide (CG), <sup>f</sup>Conductive and defective N-doped carbon (N-C), <sup>g</sup>Cellulose nanowhisker-graphene (CNG).

## References

1. Cui, Y.; Zhao, Q.; Wu, X.; Chen, X.; Yang, J.; Wang, Y.; Qin, R.; Ding, S.; Song, Y.; Wu, J.; Yang, K.; Wang, Z.; Mei, Z.; Song, Z.; Wu, H.; Jiang, Z.; Qian, G.; Yang, L.; Pan, F. An Interface-Bridged Organic–Inorganic Layer That Suppresses Dendrite Formation and Side Reactions for Ultra-Long-Life Aqueous Zinc Metal Anodes. *Angew. Chem.* **2020**, 16737–16744.
2. Cui, M.; Xiao, Y.; Kang, L.; Du, W.; Gao, Y.; Sun, X.; Zhou, Y.; Li, X.; Li, H.; Jiang, F.; Zhi, C. Quasi-Isolated Au Particles as Heterogeneous Seeds to Guide Uniform Zn Deposition for Aqueous Zinc-Ion Batteries. *ACS Appl. Energy Mater.* **2019**, 2, 6490–6496.
3. Zhao, Z.; Zhao, J.; Hu, Z.; Li, J.; Li, J.; Zhang, Y.; Wang, C.; Cui, G. Long-Life and Deeply Rechargeable Aqueous Zn Anodes Enabled by a Multifunctional Brightener-Inspired Interphase. *Energy Environ. Sci.* **2019**, 12, 1938–1949.
4. Cai, Z.; Ou, Y.; Wang, J.; Xiao, R.; Fu, L.; Yuan, Z.; Zhan, R.; Sun, Y. Chemically Resistant Cu–Zn/Zn Composite Anode for Long Cycling Aqueous Batteries. *Energy Storage Mater.* **2020**, 27, 205–211.
5. Hieu, L. T.; So, S.; Kim, I. T.; Hur, J. Zn Anode with Flexible  $\beta$ -PVDF Coating for Aqueous Zn-Ion Batteries with Long Cycle Life. *Chem. Eng. J.* **2021**, 411, 128584.
6. Zhou, M.; Guo, S.; Fang, G.; Sun, H.; Cao, X.; Zhou, J.; Pan, A.; Liang, S. Suppressing by-Product via Stratified Adsorption Effect to Assist Highly Reversible Zinc Anode in Aqueous Electrolyte. *J. Energy Chem.* **2021**, 55, 549–556.
7. Xie, X.; Liang, S.; Gao, J.; Guo, S.; Guo, J.; Wang, C.; Xu, G.; Wu, X.; Chen, G.; Zhou, J. Manipulating the Ion-Transfer Kinetics and Interface Stability for High-Performance Zinc Metal Anodes. *Energy Environ. Sci.* **2020**, 13, 503–510.
8. Cao, Z.; Zhu, X.; Xu, D.; Dong, P.; Chee, M. O.; Li, X.; Zhu, K.; Ye, M.; Shen, J. Eliminating Zn Dendrites by Commercial Cyanoacrylate Adhesive for Zinc Ion Battery. *Energy Storage Mater.* **2021**, 36, 132–138.

9. Yang, Y.; Liu, C.; Lv, Z.; Yang, H.; Zhang, Y.; Ye, M.; Chen, L.; Zhao, J.; Li, C. C. Synergistic Manipulation of  $\text{Zn}^{2+}$  Ion Flux and Desolvation Effect Enabled by Anodic Growth of a 3D  $\text{ZnF}_2$  Matrix for Long-Lifespan and Dendrite-Free Zn Metal Anodes. *Adv. Mater.* **2021**, *33*, 2007388.
10. Miao, Z.; Du, M.; Li, H.; Zhang, F.; Jiang, H.; Sang, Y.; Li, Q.; Liu, H.; Wang, S. Constructing Nano-Channeled Tin Layer on Metal Zinc for High-Performance Zinc-Ion Batteries Anode. *EcoMat* **2021**, *3*, e12125.
11. Ma, C.; Wang, X.; Lu, W.; Wang, C.; Yue, H.; Sun, G.; Zhang, D.; Du, F. Achieving Stable Zn Metal Anode via a Simple NiCo Layered Double Hydroxides Artificial Coating for High Performance Aqueous Zn-Ion Batteries. *Chem. Eng. J.* **2022**, *429*, 132576.
12. Yang, Y.; Liu, C.; Lv, Z.; Yang, H.; Cheng, X.; Zhang, S.; Ye, M.; Zhang, Y.; Chen, L.; Zhao, J.; Li, C. C. Redistributing Zn-Ion Flux by Interlayer Ion Channels in MG-Al Layered Double Hydroxide-Based Artificial Solid Electrolyte Interface for Ultra-Stable and Dendrite-Free Zn Metal Anodes. *Energy Storage Mater.* **2021**, *41*, 230–239.
13. Guo, Z.; Fan, L.; Zhao, C.; Chen, A.; Liu, N.; Zhang, Y.; Zhang, N. A Dynamic and Self-Adapting Interface Coating for Stable Zn-Metal Anodes. *Adv. Mater.* **2021**, *34*, 2105133.
14. Cao, J.; Zhang, D.; Gu, C.; Wang, X.; Wang, S.; Zhang, X.; Qin, J.; Wu, Z. S. Manipulating Crystallographic Orientation of Zinc Deposition for Dendrite-Free Zinc Ion Batteries. *Adv. Energy Mater.* **2021**, *11*, 2101299.
15. Wu, C.; Xie, K.; Ren, K.; Yang, S.; Wang, Q. Dendrite-Free Zn Anodes Enabled by Functional Nitrogen-Doped Carbon Protective Layers for Aqueous Zinc-Ion Batteries. *Dalton Trans.* **2020**, *49*, 17629–17634.
16. Zou, P.; Zhang, R.; Yao, L.; Qin, J.; Kisslinger, K.; Zhuang, H.; Xin, H. L. Ultrahigh-Rate and Long-Life Zinc–Metal Anodes Enabled by Self-Accelerated Cation Migration. *Adv. Energy Mater.* **2021**, *11*, 2100982.



17. Cao, P.; Zhou, X.; Wei, A.; Meng, Q.; Ye, H.; Liu, W.; Tang, J.; Yang, J. Fast-Charging and Ultrahigh-Capacity Zinc Metal Anode for High-Performance Aqueous Zinc-Ion Batteries. *Adv. Funct. Mater.* **2021**, *31*, 2100398.
18. Hao, J.; Li, B.; Li, X.; Zeng, X.; Zhang, S.; Yang, F.; Liu, S.; Li, D.; Wu, C.; Guo, Z. An in-Depth Study of Zn Metal Surface Chemistry for Advanced Aqueous Zn-Ion Batteries. *Adv. Mater.* **2020**, *32*, 2003021.
19. Zhang, X.; Li, J.; Liu, D.; Liu, M.; Zhou, T.; Qi, K.; Shi, L.; Zhu, Y.; Qian, Y. Ultra-Long-Life and Highly Reversible Zn Metal Anodes Enabled by a desolvation and deanionization Interface Layer. *Energy Environ. Sci.* **2021**, *14*, 3120–3129.
